# Supplementary material for: Recent Assembly of an Imprinted Domain from Non-Imprinted Components
Source: PubMed Central journal article supplement (PMC1626109; doi:10.1371/journal.pgen.0020182), 2006-10-27

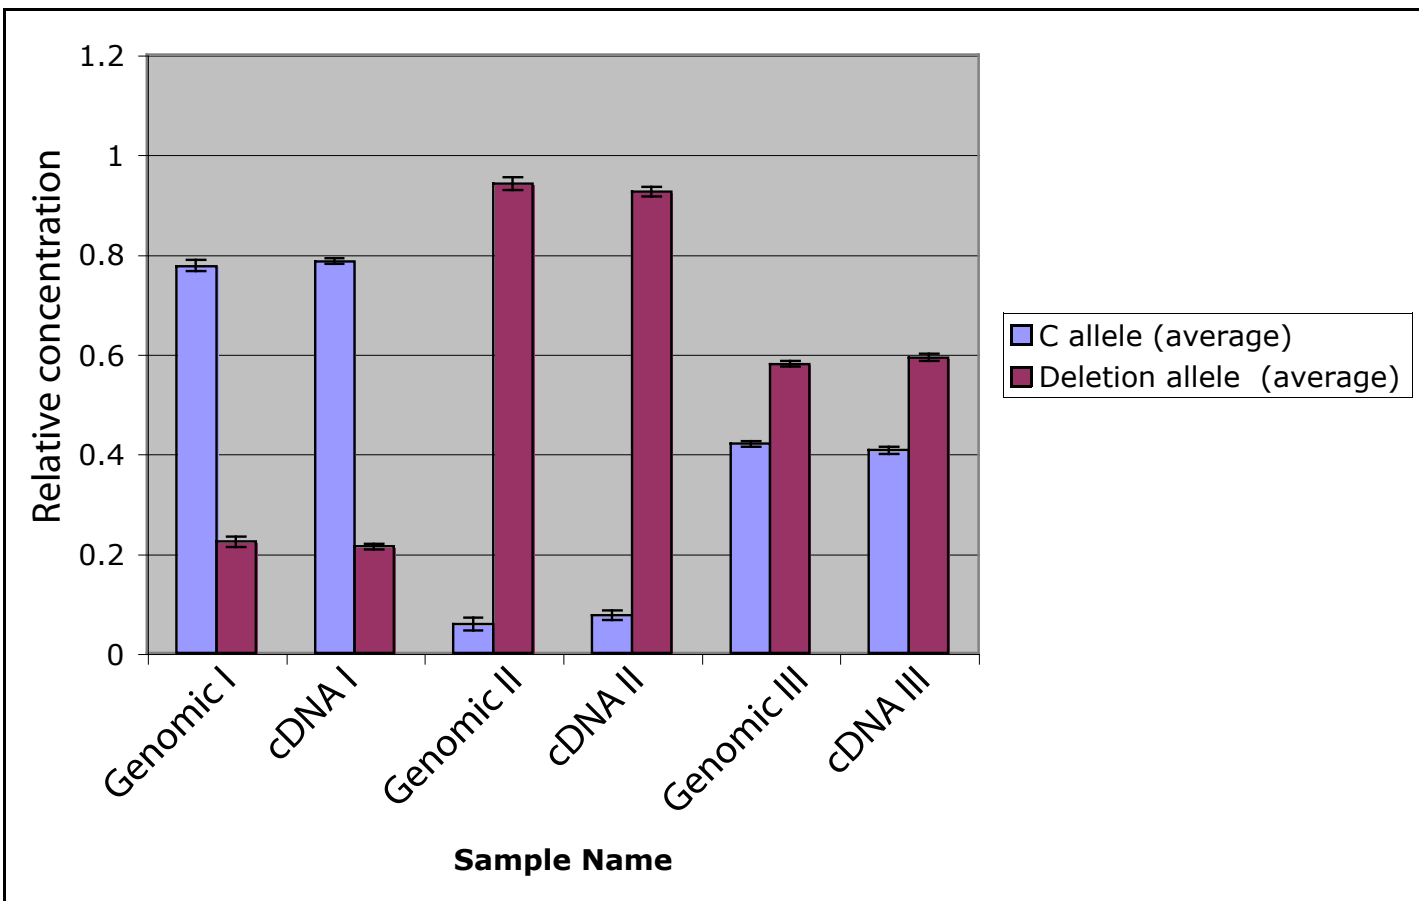

Supplement: pgen.0020182.sg002.pdf [file pgen.0020182.sg002.pdf]
